# Supplementary material
Source: publisher figshare collection journal article supplement (https://sage.figshare.com/ndownloader/files/36009545)
Supplement: Supplementary file 1 [file 36009545]

|  | | | **Total Instances Observed (%), N = Total Evaluations Performed** | | |
| --- | --- | --- | --- | --- | --- |
| **Sex** | **Clinical Observation Category** | **Analysis of Deviance p-value** | **Cambodian** | **Chinese** | **Vietnamese** |
| Male | Animal Husbandry | 0.17256 | 13 (0.14%), N=9069 | 24 (0.08%), N=29534 | - |
| Behavior/Activity | < 0.0001 | 235 (2.59%), N=9069 | 318 (1.08%), N=29534 | 21 (0.17%), N=12476 |
| Clinical Medicine | 0.59591 | 296 (3.26%), N=9069 | 579 (1.96%), N=29534 | 6 (0.05%), N=12476 |
| Dosing Observations | 0.00545 | 29 (0.32%), N=9069 | 91 (0.31%), N=29534 | 2 (0.02%), N=12476 |
| Excretion | < 0.0001 | 1963 (21.65%), N=9069 | 5950 (20.15%), N=29534 | 4677 (37.49%), N=12476 |
| External Appearance | 0.00021 | 595 (6.56%), N=9069 | 2135 (7.23%), N=29534 | 248 (1.99%), N=12476 |
| Pelage/Skin | < 0.0001 | 4702 (51.85%), N=9069 | 12993 (43.99%), N=29534 | 6324 (50.69%), N=12476 |
| Female | Animal Husbandry | < 0.0001 | 27 (0.31%), N=8759 | 87 (0.29%), N=29860 | 182 (1.47%), N=12388 |
| Behavior/Activity | < 0.0001 | 135 (1.54%), N=8759 | 305 (1.02%), N=29860 | 42 (0.34%), N=12388 |
| Clinical Medicine | < 0.0001 | 460 (5.25%), N=8759 | 847 (2.84%), N=29860 | 36 (0.29%), N=12388 |
| Dosing Observations | 0.00029 | 12 (0.14%), N=8759 | 58 (0.19%), N=29860 | - |
| Excretion | < 0.0001 | 1571 (17.94%), N=8759 | 6462 (21.64%), N=29860 | 4659 (37.61%), N=12388 |
| External Appearance | < 0.0001 | 1100 (12.56%), N=8759 | 2939 (9.84%), N=29860 | 573 (4.63%), N=12388 |
| Pelage/Skin | < 0.0001 | 4842 (55.28%), N=8759 | 15347 (51.4%), N=29860 | 6758 (54.55%), N=12388 |
